# Supplementary material for: Cyclooxygenase-2 and Prostaglandin E2 Signaling through Prostaglandin Receptor EP-2 Favor the Development of Myocarditis during Acute Trypanosoma cruzi Infection
Source: PubMed Central journal article supplement (PMC4549243; doi:10.1371/journal.pntd.0004025), 2015-08-25
Supplement: pntd.0004025.s006.pdf [file pntd.0004025.s006.pdf]

**S1 Table. Taqman probes.** List of the Taqman Probes from Applied Biosystems (A&B) used in the mRNA analysis by quantitative RT-PCR, including reference of the manufacturer, gene symbol and protein name.

| <b>CODE (A&amp;B)</b> | <b>GENE</b>   | <b>PROTEIN</b>                                 |
|-----------------------|---------------|------------------------------------------------|
| Mm 00477214_m1        | <i>Ptgs1</i>  | Cyclooxygenase 1, COX-1                        |
| Mm 00478374_m1        | <i>Ptgs2</i>  | Cyclooxygenase 2, COX-2                        |
| Mm 00452105_m1        | <i>Ptges</i>  | Prostaglandin E synthase, mPGES1               |
| Mm01330613_m1         | <i>Ptgds</i>  | Lipocalin type prostaglandin D synthase, LPGDS |
| Mm 00479846_m1        | <i>Hpgds</i>  | Hematopoietic prostaglandin D synthase, HPGDS  |
| Mm00495553_m1         | <i>Tbxas1</i> | Thromboxane synthase, TXAS                     |
| Mm 99999056_m1        | <i>Ccl2</i>   | Chemokine (C-C motif) ligand 2, MCP-1          |
| Mm 01302427_m1        | <i>Ccl5</i>   | Chemokine (C-C motif) ligand 5, RANTES         |
| Mm 00434946_m1        | <i>Cxcl9</i>  | Chemokine (C-X-C motif) ligand 9, MIG          |
| Mm 00443258_m1        | <i>Tnf</i>    | Tumor necrosis factor alpha, TNF- $\alpha$     |
| Mm 00801778_m1        | <i>Ifng</i>   | Gamma interferon , IFN- $\gamma$               |
| Mm 00446190_m1        | <i>Il6</i>    | Interleukin 6, IL-6                            |
| Mm 00439616_m1        | <i>Il10</i>   | Interleukin 10, IL-10                          |
| Mm 00445259_m1        | <i>Il4</i>    | Interleukin 4, IL-4                            |
| Mm 00442754_m1        | <i>Cd4</i>    | CD4 antigen, CD4                               |
| Mm 00839636_g1        | <i>Cd68</i>   | CD68 antigen, CD68                             |
| Mm 01182107_g1        | <i>Cd8a</i>   | CD8 antigen, alpha chain, CD8                  |
| Mm 00498698_m1        | <i>Itgax</i>  | Integrin alpha X, CD11c                        |
| Mm 00802530_m1        | <i>Emr1</i>   | F4/80                                          |
| Mm00448463_m1         | <i>Ptprc</i>  | CD45                                           |
| Mm 00475988_m1        | <i>Arg1</i>   | Arginase-1, Arg-1                              |
| Mm 00440502_m1        | <i>Nos2</i>   | Nitric oxide synthase 2, iNOS                  |

|                |               |                     |
|----------------|---------------|---------------------|
| Mm 00443097_m1 | <i>Ptger1</i> | EP-1 receptor       |
| Mm 00436051_m1 | <i>Ptger2</i> | EP-2 receptor       |
| Mm 00441045_m1 | <i>Ptger3</i> | EP-3 receptor       |
| Mm 00436053_m1 | <i>Ptger4</i> | EP-4 receptor       |
| Hs99999901_s1  | <i>18S</i>    | Eukaryotic 18S rRNA |
