# Supplementary material for: Cyclooxygenase-2 and Prostaglandin E2 Signaling through Prostaglandin Receptor EP-2 Favor the Development of Myocarditis during Acute Trypanosoma cruzi Infection
Source: PubMed Central journal article supplement (PMC4549243; doi:10.1371/journal.pntd.0004025), 2015-08-25
Supplement: pntd.0004025.s007.pdf [file pntd.0004025.s007.pdf]

**S2 Table. Antibodies.** List of antibodies from different providers used in confocal immunofluorescence and western blot analysis including the reference from each provider, the application and the dilution utilized.

| <b>ANTIBODY</b>                  | <b>REFERENCE</b> | <b>PROVIDER</b>             | <b>APPLICATION</b> | <b>DILUTION</b> |
|----------------------------------|------------------|-----------------------------|--------------------|-----------------|
| Rabbit anti-iNOS                 | sc-650           | Santa Cruz<br>Biotechnology | WB,IHF             | 1:1000, 1:200   |
| Rabbit anti-COX-2                | 160126           | Cayman<br>Chemical          | WB                 | 1:500           |
| Rabbit anti-COX-2                | 160106           | Cayman<br>Chemical          | IHF                | 1:200           |
| Goat anti-Actin                  | sc-1616          | Santa Cruz<br>Biotechnology | WB                 | 1:1000          |
| Goat anti-Arg-1                  | sc-18354         | Santa Cruz<br>Biotechnology | WB, IHF            | 1:1000, 1:200   |
| Rat anti-CD68                    | MCA1957GA        | AbD Serotec                 | IHF                | 1:200           |
| Rat anti-CD4                     | 557681           | BD Pharmigen                | IHF                | 1:200           |
| Donkey anti-Rat IgG<br>AF-488    | A-21208          | Invitrogen                  | IHF                | 1:200           |
| Donkey anti-Rabbit<br>IgG AF-647 | A-31573          | Invitrogen                  | IHF                | 1:200           |
| Rabbit anti-Goat IgG<br>AF-555   | A-21431          | Invitrogen                  | IHF                | 1:200           |
