# Supplementary material for: Cyclooxygenase-2 and Prostaglandin E2 Signaling through Prostaglandin Receptor EP-2 Favor the Development of Myocarditis during Acute Trypanosoma cruzi Infection
Source: PubMed Central journal article supplement (PMC4549243; doi:10.1371/journal.pntd.0004025), 2015-08-25
Supplement: pntd.0004025.s008.pdf [file pntd.0004025.s008.pdf]

**S1 file. Image J macro used for automated image analysis.** Plugin Trainable Weka Segmentation developed by Ignacio Arganda Carreras (Versailles, France).

```
origen = getDirectory("Elige la carpeta con las imagenes originales a
procesar");

resultados = getDirectory("Elige la carpeta para guardar los
resultados ");

lista = getFileList(origen);

setBatchMode(false);

for (z=0; z<lista.length; z++) {
showProgress(z+1, lista.length);
open(origen+lista[z]);
nombre = lista[z];
run("Advanced Weka Segmentation", "origen + nombre");
selectWindow("Advanced Weka Segmentation");
call("trainableSegmentation.Weka_Segmentation.loadClassifier", "C:\\
Users\\vlabrador\\Desktop\\clasificador.model");
wait(3000);
call("trainableSegmentation.Weka_Segmentation.applyClassifier",
origen, nombre, "showResults=true", "storeResults=false",
"probabilityMaps=false", "");
selectWindow("Advanced Weka Segmentation");
selectWindow("Classification result");
saveAs(".tiff", resultados + nombre + "-Binary");
run("Set Scale...", "distance=313.67 known=100 pixel=1 unit=µm
global");
run("Set Measurements...", "area area_fraction limit display
redirect=None decimal=3");
class1 = nombre + "__Fibrosis";
rename(class1);
//run("Threshold...");
setThreshold(175, 255);
run("Measure");
```

```
class2 = nombre + "__Fondo";
rename(class2);
//run("Threshold...");
setThreshold(150, 174);
run("Measure");
class3 = nombre + "__Nucleos";
rename(class3);
//run("Threshold...");
setThreshold(75, 100);
run("Measure");
class4 = nombre + "__Tejido y Eritrocitos";
rename(class4);
//run("Threshold...");
setThreshold(0, 74);
run("Measure");
close();
close();
close();
close();
}
selectWindow("Results");
saveAs("Text", resultados + "Resultados.xls");
run("Close");
```
